# Supplementary material
Source: HighWire-hosted journal article supplement (http://d2538ggaoe6cji.cloudfront.net/highwire/filestream/37741/field_highwire_adjunct_files/0/076653-1.pdf)
Supplement: 076653-1.pdf [file 076653-1.pdf]

# Supplemental Material

## Alternative splicing changes as drivers of cancer

Héctor Climente-González<sup>1</sup>, Eduard Porta-Pardo<sup>2</sup>, Adam Godzik<sup>2</sup>, Eduardo Eyras<sup>1,3</sup>

<sup>1</sup>Universitat Pompeu Fabra (UPF), Barcelona, Spain

<sup>2</sup>Sanford Burnham Prebys Medical Discovery Institute, La Jolla, CA, 92037, USA

<sup>3</sup>Institució Catalana de Recerca i Estudis Avançats (ICREA), Barcelona, Spain

### Supplemental Data

*Related to Figure 1*

Figure S1

Table S1

*Related to Figure 2*

Figure S2

Table S2

Table S3

*Related to Figure 3*

Figure S3

Figure S4

Figure S5

Table S4

Table S5

Table S6

*Related to Figure 4*

Figure S6

# Supplemental Data

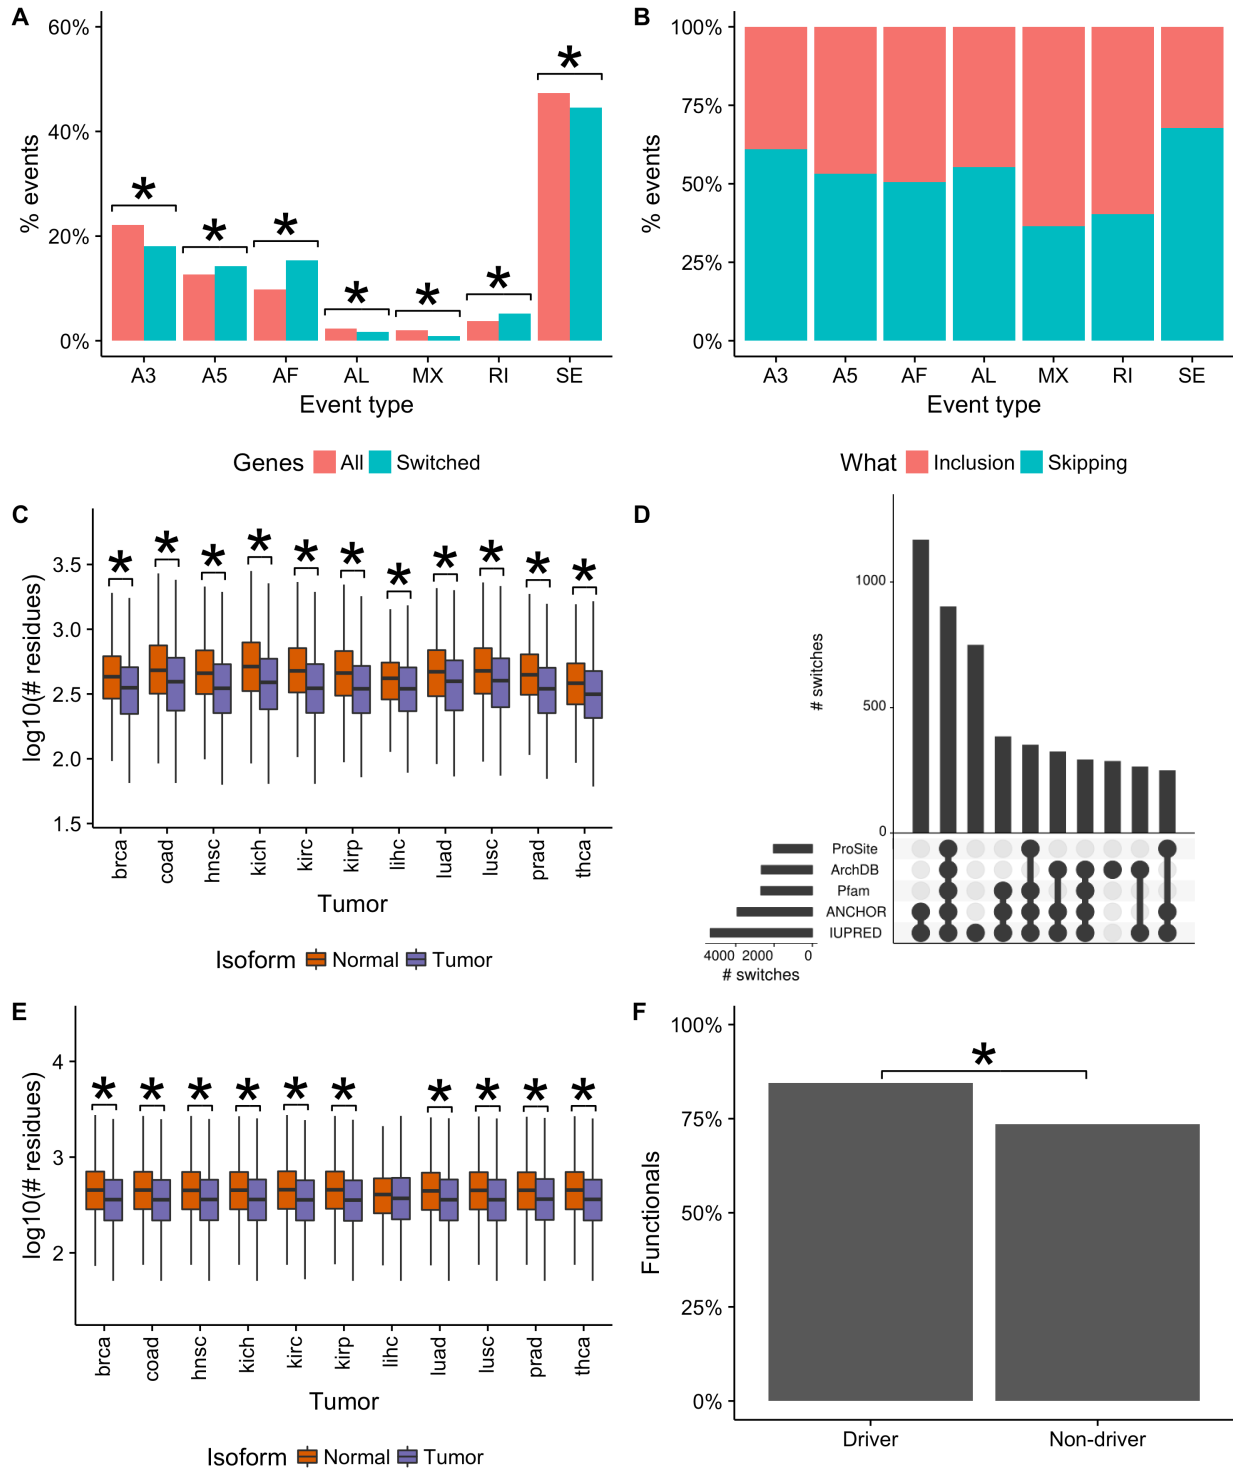

**Figure S1. Properties of isoform switches** Related to Figure 1. **(A)** Proportion of local alternative splicing event types (y-axis) described by the switches (blue) and by all genes in the annotation (red). These proportions are shown for events of type alternative 3' (A3) and 5' (A5) splice-site, alternative first (AF) and last (AL) exons, mutually exclusive exons (MX), intron

retention events (RI) and exon cassette events (SE). Significance of the difference was determined with a Fisher's exact test for each event type using a contingency table with the counts of each event type and the rest of events in the two sets: switches and annotation **(B)** For each set of local alternative splicing events from the same type mapped to isoform switches, we indicate the proportion of cases that correspond to either inclusion (red) or exclusion (blue). For instance, inclusion for the A3 and A5 events correspond to the longer form, for AF events to the most upstream exon, to the most downstream exon for AL events, to the inclusion of the exon with the lowest coordinates for MX events, to the retention of the intron for RI events, and to the inclusion of the cassette exon for SE events. Blue corresponds to the opposite configuration. Further details of the description of the events can be found in <https://github.com/comprna/SUPPA> (Alamancos et al., 2015). **(C)** Distributions of the lengths of the tumor (purple) and normal (red) protein isoforms in the calculated isoform switches. The y-axis indicates the number of residues in log10 scale. **(D)** Overlap graph (Conway et al., 2017) of protein features affected in functional switches: Prosite patterns (Prosite), protein loops (ArchDB), Pfam domains (Pfam), disordered regions with potential to mediate protein-protein interactions (ANCHOR), and general disordered regions (IUPRED). The horizontal bars indicate the number of switches affecting each feature. The vertical bars indicate the number of switches in each intersection indicated by connected bullet points. **(E)** Distributions of the lengths of the tumor (purple) and normal (red) protein isoforms in the simulated transcript isoform switches. **(F)** Enrichment of functional switches in cancer drivers. We separated all switches (from Table S1) according to whether they are cancer drivers or non-drivers (in any tumor type), and whether they have functional switches or not. From the 6004 functional switches, ~4% are drivers, whereas from the 2118 non-functional switches, ~2% are drivers. Similarly, from all considered 278 drivers, ~84% are functional, whereas ~73% of the 7844 non-driver switches are functional. A Fisher's exact test produced a p-value = 2.034e-05 and odds-ratio = 1.965563 for the enrichment of functional switches in drivers (95 percent confidence interval: 1.409, 2.799).

**Table S1. Isoform switches.** Related to Figure 1. Provided as a text file with tab-separated values (.tsv). This table contains the list of identified isoform switches used for this analysis, including functional and nonfunctional ones, and AS-drivers. The table provides the following information:

| Column number | Column label            | Description                                                                                                                                        |
|---------------|-------------------------|----------------------------------------------------------------------------------------------------------------------------------------------------|
| 1             | GeneId                  | Entrez gene id                                                                                                                                     |
| 2             | Symbol                  | HGNC gene symbol                                                                                                                                   |
| 3             | Normal_transcript       | UCSC transcript id                                                                                                                                 |
| 4             | Tumor_transcript        | UCSC transcript id                                                                                                                                 |
| 5             | Normal_protein          | Uniprot_ID (None if not known)                                                                                                                     |
| 6             | Tumor_protein           | Uniprot_ID (None if not known)                                                                                                                     |
| 7             | DriverAnnotation        | “Driver” if it’s a driver, “d1” if it’s an interactor of a driver, and “Nothing” otherwise                                                         |
| 8             | IsFunctional            | 1 if it is functional as defined in the article, 0 otherwise                                                                                       |
| 9             | Driver                  | 1 if it is a driver, 0 otherwise                                                                                                                   |
| 10            | Druggable               | 1 if it is a target of a known drug according to DGIdb ( <a href="http://dgidb.genome.wustl.edu/">http://dgidb.genome.wustl.edu/</a> )             |
| 11            | CDS_Normal              | 1 if the normal transcript has an annotated CDS, 0 otherwise                                                                                       |
| 12            | CDS_Tumor               | 1 if the tumor transcript has an annotated CDS, 0 otherwise                                                                                        |
| 13            | CDS_change              | 1 if the CDS changes between the tumor and normal transcripts                                                                                      |
| 14            | UTR_change              | 1 if the 5’3 or 3’ UTRs change between the tumor and normal transcripts                                                                            |
| 15            | Tumors                  | Tumor types in which the switch appears (brca, coad, etc...)                                                                                       |
| 16            | Number_samples          | Number of samples in which the switch appears                                                                                                      |
| 17            | Percentage_samples      | Percentage of samples from the total studied across all tumor types in which the switch appears                                                    |
| 18            | Samples                 | IDs of samples in which the switch appears                                                                                                         |
| 19            | Recurrence              | 1 if it is recurrent, 0 otherwise                                                                                                                  |
| 20            | PPI                     | 1 if the switch affects a PPI in every tumor type where it appears; 0 otherwise. All PPIs affected by switches per tumor type are in Supp. File 3. |
| 21            | Affects_mutated_feature | 1 if the switch leads to a gain or loss of a domain that is enriched in mutations in tumors, 0 otherwise                                           |
| 22            | Pannegative             | Number of cancer drivers from the same pathway with which the switch shows mutual exclusion                                                        |
| 23            | AS_driver               | 1 if 19,20,21 or 22 is equal to 1, 0 otherwise                                                                                                     |
| 24            | MS.pam                  | Samples with co-occurrence of switch and PAM in the same gene                                                                                      |
| 25            | M.pam                   | Samples with PAMs only                                                                                                                             |
| 26            | S.pam                   | Samples with Switches                                                                                                                              |
| 27            | N.pam                   | Rest of samples                                                                                                                                    |
| 28            | p.pam.me                | p-value of the mutual exclusion test                                                                                                               |
| 29            | MS.mut                  | Samples with co-occurrence of switch and WGS mutations                                                                                             |
| 30            | M.mut                   | Samples with WGS mutations only                                                                                                                    |
| 31            | S.mut                   | Samples with Switches                                                                                                                              |
| 32            | N.mut                   | Rest of samples                                                                                                                                    |
| 33            | p.mut.o                 | p-value of the co-occurrence of mutations and switches                                                                                             |

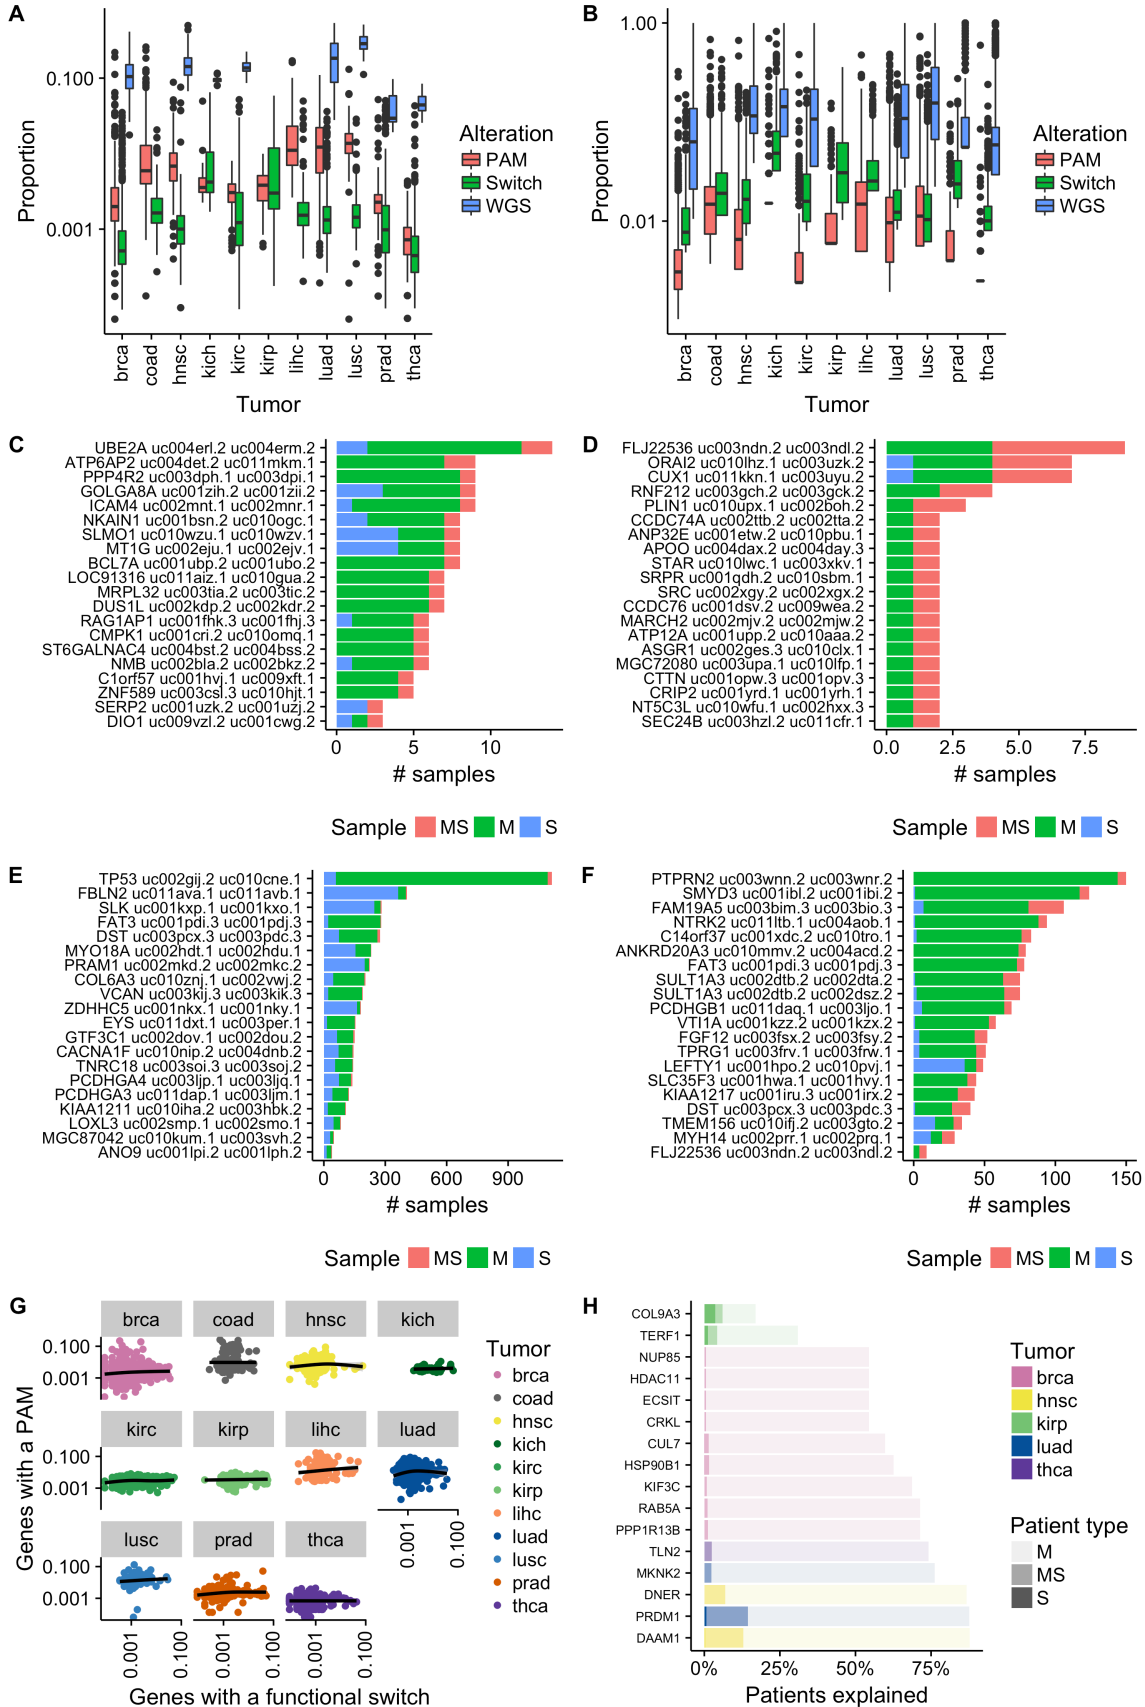

**Figure S2. Properties of functional isoform switches in tumors.** Related to Figure 2. **(A)** Proportion of genes in  $\log_{10}$  scale ( $y$ -axis) with either of these three alterations: isoform switches (red), protein-affecting mutations (PAMs) from whole Exome sequencing (WES) data (green), and any mutation type from whole genome sequencing (WGS) data (blue). **(B)** Proportion of samples ( $y$ -axis) with either of these three alterations: isoform switches (red), PAMs from WES data (green), and any mutation type from WGS data (blue). **(C-F)** Potential associations between mutations and switches. We show the top 20 cases according to the Jaccard score for the association of mutations (M) and switches (S) using WES (C) and WGS (D) data. We also show the top 20 cases according to the number of MS samples for WES (E) and WGS (F) data. For each gene and isoform ( $y$  axis), we show the number of patients for which we observed a mutation only (M), a switch only (S), or the co-occurrence of both (MS). **(G)** Lack of correlation between mutations and switches. For each tumor type, each dot represents a sample according to the number of genes with a functional switch ( $x$ -axis) and the number of genes with protein-affecting mutations (PAMs) ( $y$ -axis). **(H)** Functional switches that potentially characterize pan-negative tumor samples. For each switch along the  $y$ -axis, we represent the proportion of patients from a given tumor type ( $x$ -axis) that harbor mutations in a tumor-specific mutational driver (M), have the switch (S), or have both (MS). The switches are ranked from the bottom of the  $y$ -axis according to the total number of patients explained. Only the top 30 cases are shown. Each case is color-coded according to tumor type.

**Table S2. Mutation and domain gain/loss enrichments in protein domain families.** Related to Figure 2. Provided as a text file with tab-separated values (.tsv). This table contains the information about the Protein domain families that are significantly enriched in mutations as well as gains or losses in isoform switches. The information provided for each domain family is the following:

| Column number | Column label          | Description                                      |
|---------------|-----------------------|--------------------------------------------------|
| 1             | Pfam_id               | PFAM ID for the domain family                    |
| 2             | Name                  | Name of the domain family                        |
| 3             | p_switch_gain         | P-value for the gain-test                        |
| 4             | adjp_switch_gain      | Adjusted P-value for the gain-test               |
| 5             | p_switch_loss         | P-value for the loss-test                        |
| 6             | adjp_switch_loss      | Adjusted P-value for the loss-test               |
| 7             | p_mutation            | P-value for the mutation-test                    |
| 8             | adjp_mutation         | Adjusted P-value for the mutation-test           |
| 9             | Switches_where_gained | Number of switches where domain family is gained |
| 10            | Switches_where_lost   | Number of switches where domain family is lost   |

**Table S3. Mutual exclusion analysis between switches and cancer drivers.** Related to Figure 2. Provided as a text file with tab-separated values (.tsv). This table contains the analysis of mutual exclusion between functional switches, *global mutual exclusion*, and mutational drivers in the same pathway, *local mutual exclusion*. Switches present global mutual exclusion if they exhibit an extreme mutually exclusive pattern ( $p_{mut\_ex} < 0.05$ ) with at least 3 of the most frequent tumor drivers for a certain cancer type ( $Number\_ME\_drivers \geq 3$ ). Switches present local mutual exclusion if they exhibit an extreme mutually exclusive pattern ( $p_{me\_pathway\_driver} < 0.05$ ) with a driver from the same pathway (indicated in *Same\_pathway\_driver*). Switches that display both local and global mutual exclusion are considered Pan-negative AS-drivers.

| Column number | Column label         | Description                                                                     |
|---------------|----------------------|---------------------------------------------------------------------------------|
| 1             | Genelid              | Entrez gene ID                                                                  |
| 2             | Symbol               | HGNC gene symbol                                                                |
| 3             | Normal_transcript    | UCSC transcript id                                                              |
| 4             | Tumor_transcript     | UCSC transcript id                                                              |
| 5             | Tumor                | Tumor type (brca, coad, etc...)                                                 |
| 6             | p_mut_ex             | P-value for the test for mutual exclusion (ME) with mutational drivers          |
| 7             | Number_ME_drivers    | Number of drivers with mutual exclusion (ME)                                    |
| 8             | MS_mut_ex            | Number of samples with mutation (M) and switch (S)                              |
| 9             | M_mut_ex             | Number of samples with only M                                                   |
| 10            | S_mut_ex             | Number of samples with only S                                                   |
| 11            | N_mut_ex             | Number of samples without M or S                                                |
| 12            | ME_drivers           | HGNC gene symbols for the ME drivers                                            |
| 13            | Same_pathway_driver  | Pathways shared with ME drivers                                                 |
| 14            | p_me_pathway_driver  | P-value for the test for mutual exclusion (ME) with drivers in the same pathway |
| 15            | MS_me_pathway_driver | Number of samples with mutation (M) and switch (S)                              |
| 16            | M_me_pathway_driver  | Number of samples with only M                                                   |
| 17            | S_me_pathway_driver  | Number of samples with only S                                                   |
| 18            | N_me_pathway_driver  | Number of samples without M or S                                                |



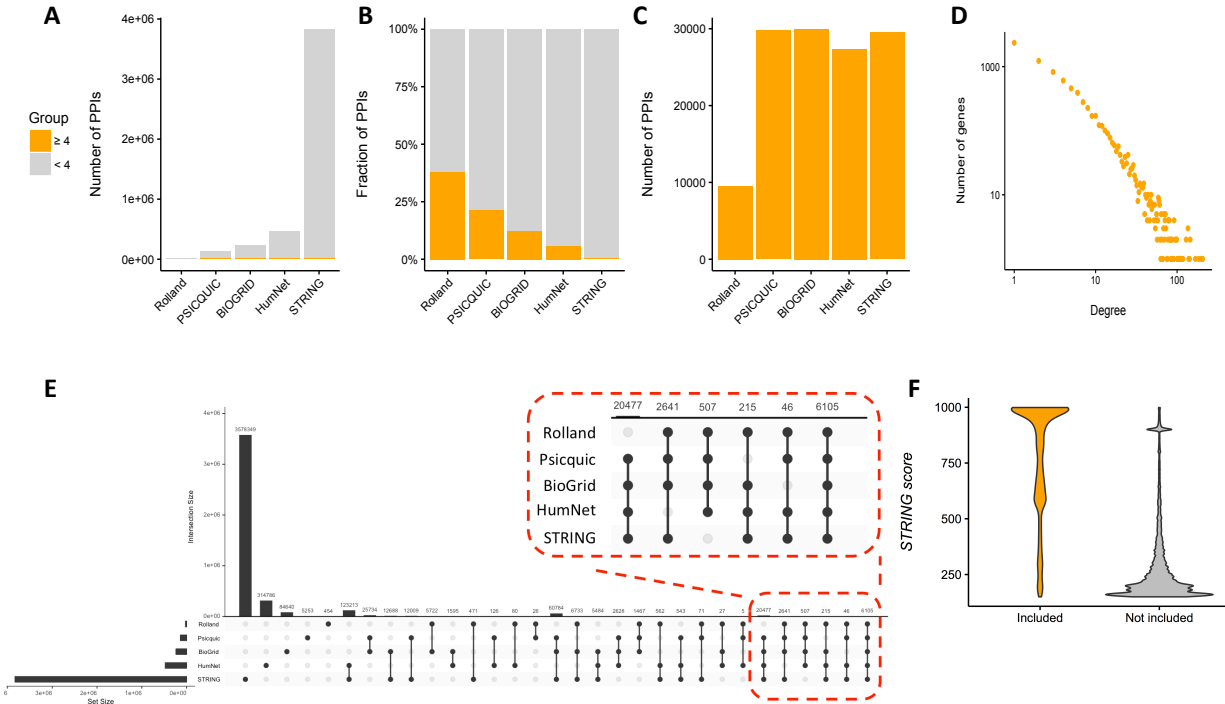

**Figure S3. Protein-protein interaction network.** Related to Figure 3. **(A)** Consensus protein–protein interaction (PPI) network. We used data from five different sources: PSICQUIC, BIOGRID, HumNet, STRING, and (Rolland et al., 2014). These networks vary in their size, connectivity, and origin, with PSICQUIC, BIOGRID, and Rolland being experimental networks and HumNet and STRING being functional networks. To build our consensus network, we used only those interactions that were defined in at least four different networks (shown in orange). **(B)** Fraction of each network included in the consensus network, with the data from (Rolland et al., 2014) having over 30% of its interactions and STRING less than 5%. **(C)** Number of interactions from each network included in the consensus network. **(D)** Degree distribution of the consensus network. For each number of PPI connections (x-axis), we give the number of genes with this degree (y-axis). **(E)** Highlighted in red are the PPIs considered for our analysis. Despite the fact that the dataset published in Rolland et al. was obtained through a search for new protein-protein interactions, many interactions in Rolland et al. are also present in the other PPI databases, with only 454 unique to Rolland et al. The plot also shows that even though many interactions are only present in STRING, most of them are not taken into account in our analysis. Plot performed with UpSetR (Conway et al., 2017). The horizontal bars indicate the number of switches for each property. The vertical bars indicate the number of switches in each of the intersections indicated by connected bullet points. **(F)** STRING PPIs included in our analysis (present in at least three other databases) are enriched for high-scoring interactions.

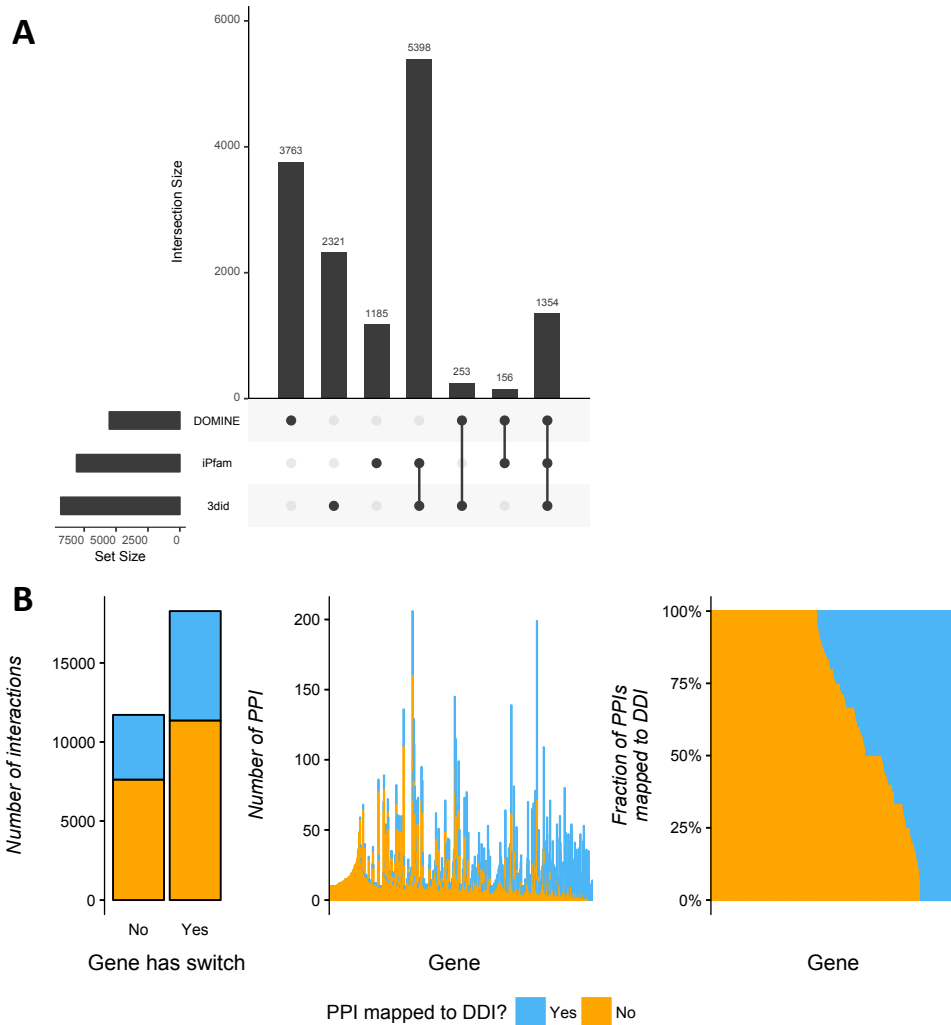

**Figure S4. Protein-protein interactions assigned to functional isoform switches.** Related to Figure 3. **(A)** Number of domain–domain interactions (DDIs) analyzed, separated by source: 3did, iPfam, DOMINE. The plot shows the number of cases in each source (horizontal bars) and the intersections between the sources (vertical bars), which are indicated by connected bullet points **(B)** Mapping of switches to protein-protein interactions (PPIs). Left panel: From a total of 29991 PPIs, 11008 of them were mapped to DDIs, 6917 of them in genes with switches whereas 4091 are in genes without switches. The rest of the 18983 PPIs did not map to DDIs: 11361 corresponded to genes with switches, and 7622 to genes without switches. Middle panel: Absolute number of PPI interactions mapped (blue) or not mapped (orange) to a DDI in each gene (only genes with at least 10 PPIs are depicted). Genes are sorted according to the fraction of interactions that could be mapped to DDIs. The picture shows no correlation between the degree of a gene and the fraction of interactions mapped. Right panel: Fraction of PPIs mapped to DDIs per gene. Genes are sorted according to the fraction of PPIs successfully mapped to DDIs.

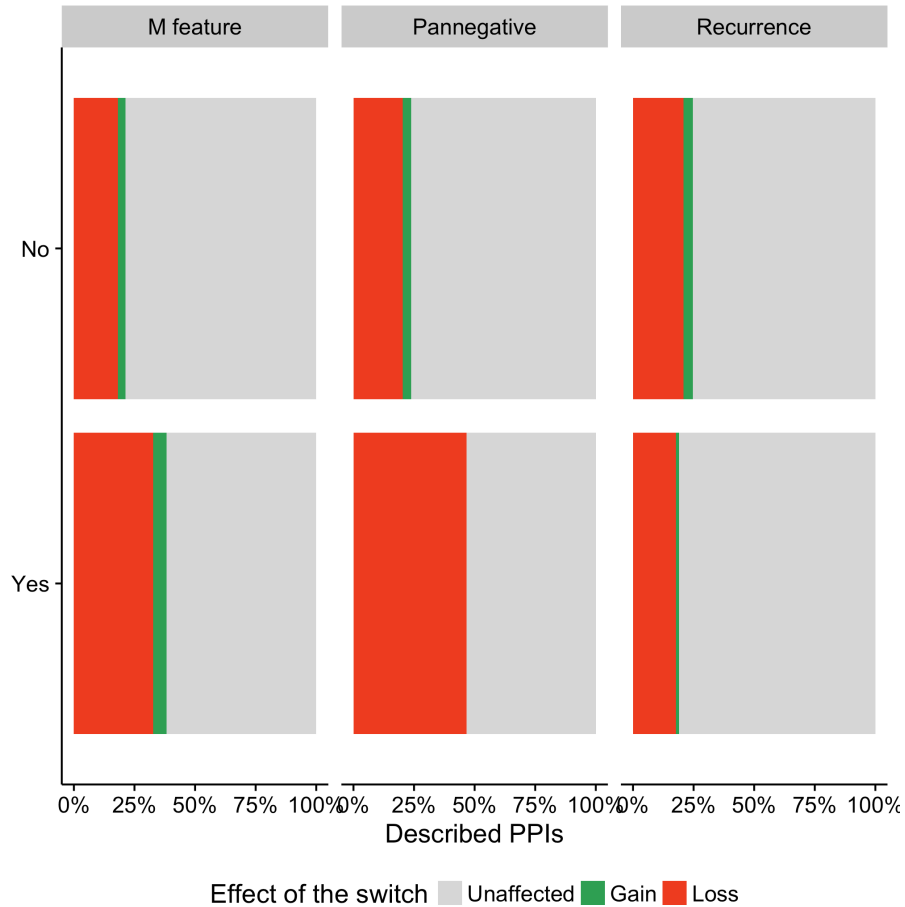

**Figure S5. Properties of switches that affect protein-protein interactions.** Related to Figure 3. Comparison of proportions of functional switches that affect protein-protein interactions (PPIs). In the left panel, functional switches are divided according to whether they affect domains frequently mutated in cancer (M feature) (Yes) or not (No). In the middle panel, functional switches are divided according to whether the switch has significant mutual exclusion with tumor-specific drivers (Pannegative). In the right panel, functional switches are divided according to whether they are recurrent (Yes) or not (No). In each subset we plot the proportion of PPIs that are kept unaffected (gray), lost (red), or gained (green). Using these three categories and the two values for each feature, M feature and Pannegative associate frequently with PPI-affecting switches (Chi-square test p-value < 2.2e-16 and p-value = 6.8e-08, respectively).

**Table S4. Protein features and protein-protein interactions affected by isoform switches.** Related to Figure 3. Provided as a text file with tab-separated values (.tsv). This table contains the proteins features and protein–protein interactions affected in each functional switch. The column descriptions are:

| Column number | Column label          | Description                                                              |
|---------------|-----------------------|--------------------------------------------------------------------------|
| 1             | Tumor                 | Tumor type (brca, coad, etc...)                                          |
| 2             | Genelid               | Entrez gene ID                                                           |
| 3             | Symbol                | HGNC gene symbol                                                         |
| 4             | Normal_transcript     | UCSC transcript id                                                       |
| 5             | Tumor_transcript      | UCSC transcript id                                                       |
| 6             | Feature_type          | Pfam, Prosite, IUPRED, ANCHOR                                            |
| 7             | Feature_id            | ID for the protein feature if available                                  |
| 8             | Feature_name          | Name of Feature if available, positions in protein for IUPRED and ANCHOR |
| 9             | Observation           | Gained_in_tumor/Lost_in_tumor/No_change                                  |
| 10            | Normal_isoform_order  | Domain copy this corresponds to / total copies in normal isoform         |
| 11            | Tumor_isoform_order   | Domain copy this corresponds to / total copies in tumor isoform          |
| 12            | Genelid_partner       | Entrez ID of the protein-protein interaction partner                     |
| 13            | Symbol_partner        | HGNC symbol of the protein-protein interaction partner                   |
| 14            | Transcript_partner    | Transcripts identified as coding the interaction partner                 |
| 15            | Pfam_id_partner       | PFAM ID for the domain mediating the interaction                         |
| 16            | Effect_on_interaction | Unaffected/Gain/Loss/NA(no interaction data)                             |

**Table S5. Pathways enriched in PPI-affecting switches.** Related to Figure 3. Provided as a text file with tab-separated values (.tsv). This table contains the gene sets that are enriched in isoform switches that are predicted to affect protein-protein interactions. The enrichment tests is a Fisher’s exact test based on the separations of switches being in the pathway or not, and affecting PPIs or not. We have tested Pathways, Complexes and gene sets-related to mRNA-metabolism. Only Pathways showed enrichment after multiple-test correction. The column descriptions are:

| Column number | Column label   | Description                                            |
|---------------|----------------|--------------------------------------------------------|
| 1             | Geneset_type   | Pathway/Complex/mRNA_regulation                        |
| 2             | Geneset        | Name of the gene set                                   |
| 3             | Number_drivers | Number of drivers in the gene set.                     |
| 4             | p              | Fisher’s exact test p-value                            |
| 5             | adjp           | p-value corrected for multiple testing                 |
| 6             | OR             | Odds-ratio                                             |
| 7             | eOR            | Estimated odds-ration using with pseudocounts          |
| 8             | Switched_genes | Genes in the gene set that have a PPI-affecting switch |

**Table S6. Gene modules with protein-protein interactions affected by isoform switches.**

Related to Figure 3. Provided as a text file with tab-separated values (.tsv). This table contains modules with high density of affected interactions: sets of genes that are connected in the network of protein-protein interactions and many of their interactions are affected by the isoform switches and separately from other genes in the PPI network. We provide a test for assigning a complex or pathway based on the intersection of the complex/pathway to the module (see Experimental Procedures for details). The column descriptions are:

| Column number | Column label      | Description                                                                                                    |
|---------------|-------------------|----------------------------------------------------------------------------------------------------------------|
| 1             | Module            | Module number                                                                                                  |
| 2             | Module_components | Genes in the module (calculated from the network of protein-protein interactions affected by isoform switches) |
| 3             | Geneset           | Name of complex/pathway compared to the module (NA if none was assigned)                                       |
| 4             | Geneset_size      | Number of genes in the complex/pathway (NA if none was assigned)                                               |
| 5             | p                 | p-value from binomial test for the intersection of the gene set (Complex/Pathway) to the module                |
| 6             | Intersection      | Number of genes from the gene set that are in the module                                                       |
| 7             | Number_drivers    | Number of cancer drivers in the module                                                                         |
| 8             | padj              | p-value corrected for multiple testing                                                                         |

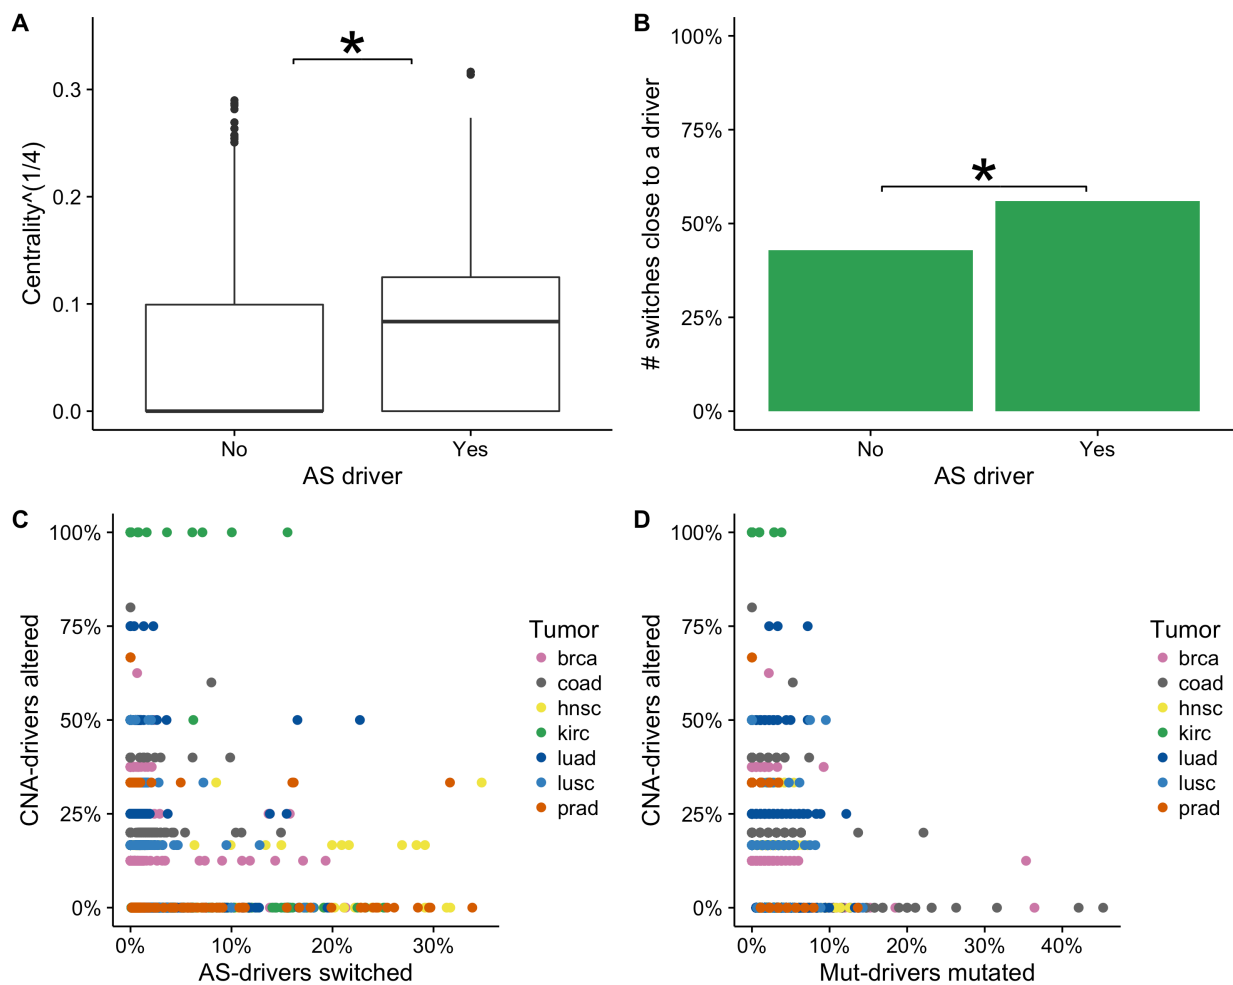

**Figure S6. AS-drivers.** Related to Figure 4. **(A)** We show the distribution of centrality values for switches predicted as AS-drivers (Yes) or not (No) (Mann-Whitney test p-value < 2.2e-16, W = 90999000). The y-axis shows the values of the 4th root of centrality ( $\text{centrality}^{1/4}$ ). **(B)** We show the proportion of AS-drivers and switches non-drivers that are separated according to the closest driver distance (CDD), calculated as the distance to the closest tumor-specific cancer gene driver in the consensus PPI network. Every switch with  $\text{CDD} \leq 3$  was labelled as “Close to a driver”. Otherwise, it was labelled “Far from a driver” otherwise. A Fisher’s exact test on the proportion of switches AS-drivers or non AS-drivers that are close or far from a driver gives an enrichment of AS-drivers close to drivers (p-value < 2.2e-16, odds-ratio = 1.55). **(C)** Each patient is colored by tumor type and represented according to the percentage of tumor-specific copy number alteration (CNA) driver genes amplified in that sample (y axis) and the percentage of AS-drivers occurring in the same sample (x axis). **(D)** Each patient is colored by tumor type and represented according to the percentage of tumor-specific CNA driver genes amplified in that sample (y axis) and the percentage of mutational drivers mutated in the same sample (x axis)

## References

- Alamancos, G.P., Pagés, A., Trincado, J.L., Eyras, E., Pages, A., Trincado, J.L., Bellora, N., Eyras, E., 2015. Leveraging transcript quantification for fast computation of alternative splicing profiles. *RNA* 21, 1521–1531. doi:10.1261/rna.051557.115
- Conway, J.R., Lex, A., Gehlenborg, N., 2017. UpSetR: An R Package for the Visualization of Intersecting Sets and their Properties 2–5. doi:10.1101/120600
- Rolland, T., Taşan, M., Charlotiaux, B., Pevzner, S.J., Zhong, Q., Sahni, N., Yi, S., Lemmens, I., Fontanillo, C., Mosca, R., Kamburov, A., Ghiassian, S.D., Yang, X., Ghamsari, L., Balcha, D., Begg, B.E., Braun, P., Brehme, M., Broly, M.P., Carvunis, A.R., Convery-Zupan, D., Corominas, R., Coulombe-Huntington, J., Dann, E., Dreze, M., Dricot, A., Fan, C., Franzosa, E., Gebreab, F., Gutierrez, B.J., Hardy, M.F., Jin, M., Kang, S., Kiros, R., Lin, G.N., Luck, K., Macwilliams, A., Menche, J., Murray, R.R., Palagi, A., Poulin, M.M., Rambout, X., Rasla, J., Reichert, P., Romero, V., Ruysinck, E., Sahalie, J.M., Scholz, A., Shah, A.A., Sharma, A., Shen, Y., Spirohn, K., Tam, S., Tejeda, A.O., Trigg, S.A., Twizere, J.C., Vega, K., Walsh, J., Cusick, M.E., Xia, Y., Barabási, A.L., Iakoucheva, L.M., Aloy, P., De Las Rivas, J., Tavernier, J., Calderwood, M.A., Hill, D.E., Hao, T., Roth, F.P., Vidal, M., 2014. A proteome-scale map of the human interactome network. *Cell* 159, 1212–1226. doi:10.1016/j.cell.2014.10.050
